# Supplementary material for: Anaplastic Thyroid Carcinoma: A ceRNA Analysis Pointed to a Crosstalk betweenSOX2,TP53, and microRNA Biogenesis
Source: Hindawi journal article supplement (doi:10.1155/2015/439370), 2015-01-01
Supplement: f1 [file 439370.f1.pdf]

**Sup. Tab. 1:  $\Delta$ Ct vs  $\beta$ -Actin:** difference between the Cycle threshold (Ct) of the gene of interest and the Ct of  $\beta$ -Actin reference sequence in different specimens in RT-PCR.

| $\Delta$ Ct vs $\beta$ -Actin | SOX2             | DICER1           | TP53             | RNASEN          | EIF2C2           | COX8A            | CCND1            |
|-------------------------------|------------------|------------------|------------------|-----------------|------------------|------------------|------------------|
| <b>SW1736</b>                 | 12,59 $\pm$ 0,26 | 10,58 $\pm$ 0,14 | 2,23 $\pm$ 0,34  | 7,34 $\pm$ 0,30 | 5,56 $\pm$ 0,50  | -3,31 $\pm$ 0,37 | -0,52 $\pm$ 0,29 |
| <b>8505C</b>                  | 16,05 $\pm$ 0,51 | 7,44 $\pm$ 0,26  | -3,82 $\pm$ 0,06 | 2,48 $\pm$ 0,01 | 1,42 $\pm$ 0,74  | -2,33 $\pm$ 0,10 | -2,60 $\pm$ 0,40 |
| <b>C643</b>                   | 15,82 $\pm$ 0,76 | 5,41 $\pm$ 0,07  | -3,74 $\pm$ 0,40 | 3,16 $\pm$ 0,07 | 1,02 $\pm$ 0,06  | -3,05 $\pm$ 0,14 | -2,32 $\pm$ 0,24 |
| <b>FRO</b>                    | 10,03 $\pm$ 0,16 | 5,18 $\pm$ 0,84  | -4,23 $\pm$ 0,23 | 3,05 $\pm$ 0,19 | -1,05 $\pm$ 0,11 | -8,25 $\pm$ 0,04 | -1,49 $\pm$ 0,15 |
| <b>BCPAP</b>                  | 10,97 $\pm$ 0,06 | 9,34 $\pm$ 0,13  | 0,75 $\pm$ 1,01  | 6,75 $\pm$ 0,54 | 3,33 $\pm$ 0,35  | -4,17 $\pm$ 0,10 | 0,15 $\pm$ 0,07  |
| <b>TPC-1</b>                  | 11,19 $\pm$ 0,91 | 9,29 $\pm$ 0,40  | 0,59 $\pm$ 0,30  | 8,46 $\pm$ 0,13 | 3,40 $\pm$ 0,23  | -5,94 $\pm$ 0,19 | 1,26 $\pm$ 0,18  |
| <b>WRO</b>                    | 12,42 $\pm$ 0,34 | 9,41 $\pm$ 0,26  | 0,81 $\pm$ 0,27  | 8,31 $\pm$ 0,33 | 3,47 $\pm$ 0,04  | -4,43 $\pm$ 0,90 | -2,41 $\pm$ 0,08 |
| <b>Normal Thyroid Pool</b>    | 13,52 $\pm$ 0,63 | 6,91 $\pm$ 0,96  | -1,66 $\pm$ 0,08 | 5,62 $\pm$ 0,71 | 2,13 $\pm$ 0,59  | -9,18 $\pm$ 0,73 | -1,28 $\pm$ 0,46 |
| <b>Limbal Stem Cells</b>      | 11,55 $\pm$ 0,58 | 9,69 $\pm$ 0,08  | 1,53 $\pm$ 0,54  | 7,77 $\pm$ 0,93 | 3,95 $\pm$ 0,44  | -5,52 $\pm$ 0,47 | -4,16 $\pm$ 0,32 |
| <b>Lymphocytes</b>            | 10,84 $\pm$ 0,36 | 5,89 $\pm$ 0,58  | -3,94 $\pm$ 0,51 | 4,77 $\pm$ 0,05 | 1,87 $\pm$ 0,72  | -2,36 $\pm$ 0,41 | 0,13 $\pm$ 0,91  |
